# Supplementary material
Source: PubMed Central journal article supplement (PMC8982985)
Supplement: NIHMS1758593-supplement-1.pdf [file NIHMS1758593-supplement-1.pdf]

Supplemental figures

Supplemental fig 1

PD-1+ CD122+ cells are predominantly CD44<sup>lo</sup> and PD-1+ CD122- cells don't express Runx3 and  $\alpha 4\beta 7$

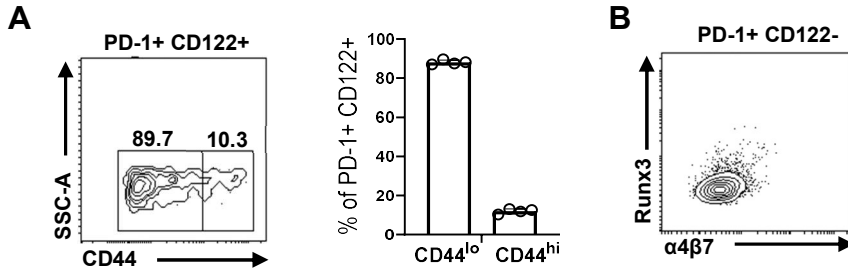

A) The representative dot plot examines CD44 expression and bar graph shows the frequency of CD44<sup>hi</sup> and CD44<sup>lo</sup> cells among PD-1+ CD122+ cells in WT mice. B) The representative dot plot examines Runx3 and  $\alpha 4\beta 7$  expression within PD-1+ CD122- cells in WT mice. Results are representative of at least 3 independent experiments with n=4 or more mice per group.

## Supplemental fig 2

### CD122, Nur77 and CD5 expression in PD-1<sup>+</sup> CD122<sup>+</sup> CD44<sup>lo</sup> sub-populations

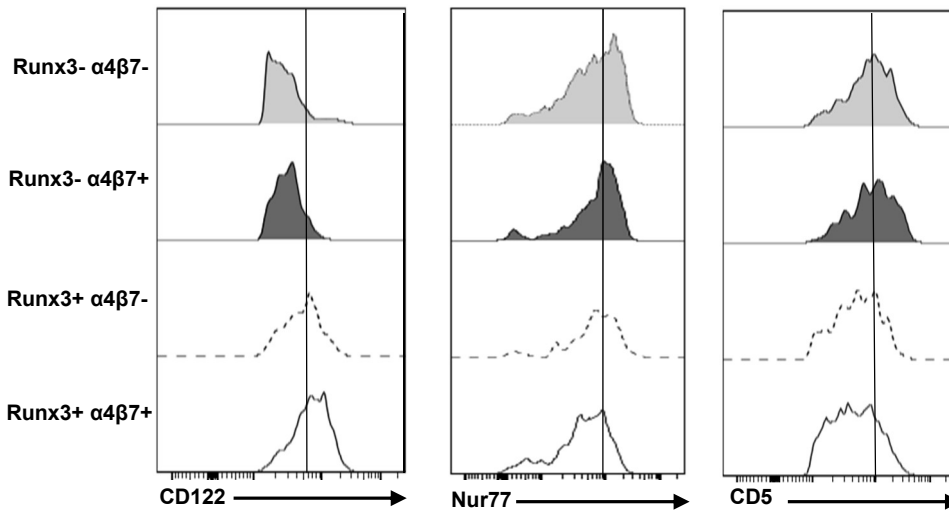

The histograms show the expression of CD122 and CD5 from WT mice and Nur77 from Nur77-GFP mice in Runx3-  $\alpha 4\beta 7$ - (light grey filled), Runx3-  $\alpha 4\beta 7$ + (dark grey filled), Runx3+  $\alpha 4\beta 7$ - (dashed no fill) and Runx3+  $\alpha 4\beta 7$ + (solid no fill) sub-populations within PD-1<sup>+</sup> CD122<sup>+</sup> CD44<sup>lo</sup> post-selected DN thymocytes. Results are representative of at least 3 independent experiments with n=3 or more mice per group.

### Supplemental fig 3

#### IL-2/15 neutralization is efficient and does not affect IELp survival

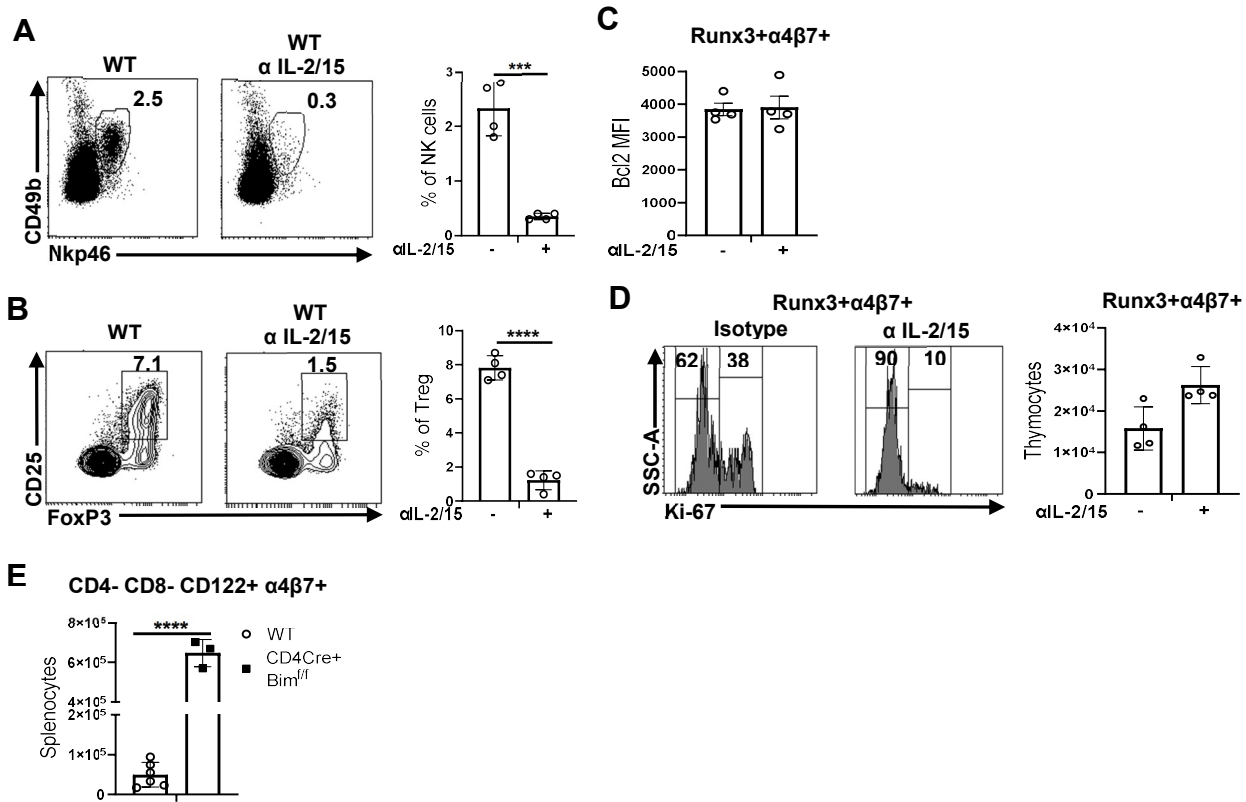

The representative dot plots and bar graphs compare in WT mice treated with isotype control or anti-IL-2 and IL-15 antibodies (A) the frequency of NK cells in the spleen (B) the frequency of CD25+ Foxp3+ Tregs in the spleen (C) The bar graph shows the Bcl-2 MFI in Runx3+ α4β7+ IELp in the thymus in mice treated with isotype control (-) or with anti-IL-2 and IL-15 (+) as indicated below the bars on the x-axis. (D) The histograms show the frequency of Ki-67+ cells amongst thymic Runx3+ α4β7+ IELp in mice treated with isotype and anti-IL-2 and IL-15 antibodies and the bar graph shows the numbers of Runx3+ α4β7+ IELp in mice treated with isotype control (-) or with anti-IL-2 and IL-15 (+) as indicated below the bars on the x-axis. (E) The bar graph shows the number of CD4- CD8- CD122+ α4β7+ splenocytes in WT and CD4Cre+Bim<sup>f/f</sup> mice. Results are representative of 2 independent experiments with n=5 or more mice per group and show mean ± SD. \*\*\**p* < 0.001, \*\*\*\**p* < 0.0001, Student's t test.

Supplemental fig 4

Bcl-2 family members in PD-1+ CD122+ CD44<sup>lo</sup> IELP

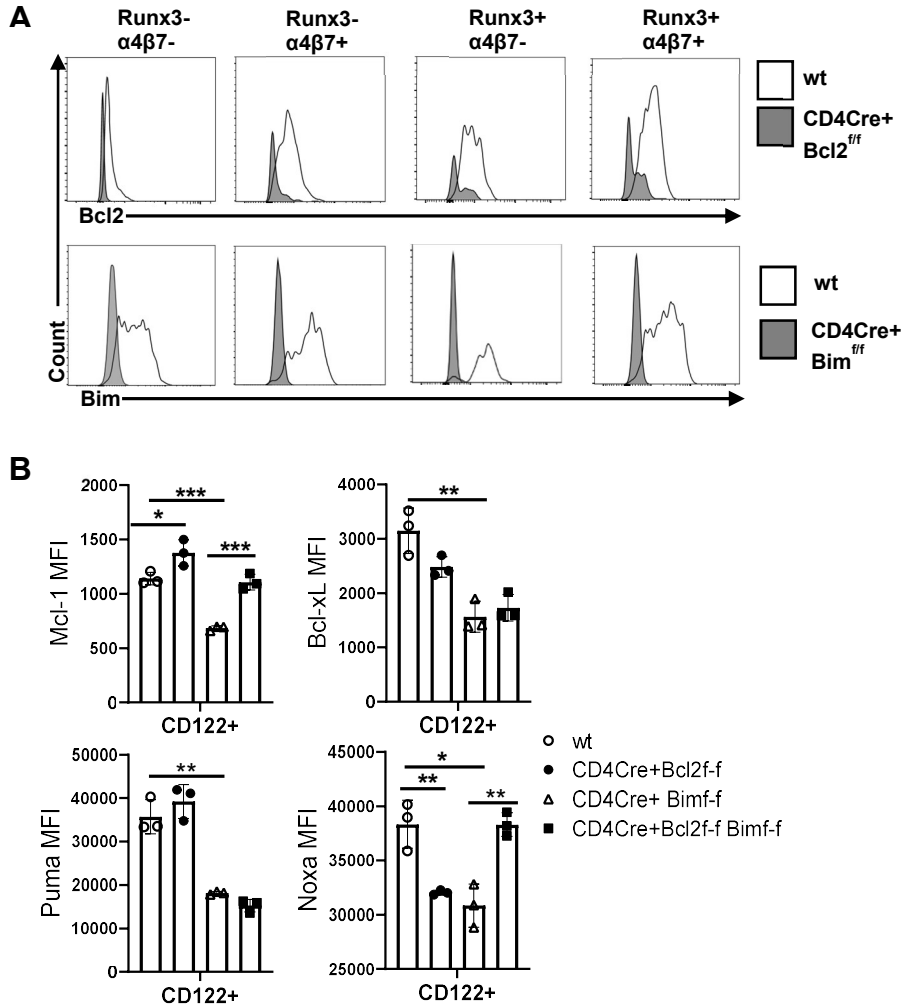

(A) Histogram overlays show the efficiency of Bcl2 deletion (top) in CD4Cre+Bcl2<sup>f/f</sup> thymocytes (gray filled) and Bim deletion (bottom) in CD4Cre+Bim<sup>f/f</sup> thymocytes (gray filled) in comparison to WT thymocytes (no fill) among the different PD1+ CD122+ CD44<sup>lo</sup> sub-populations. (B) Bar graphs represent flow cytometric mean fluorescence intensities of Mcl-1, Bcl-xL, Puma and Noxa in PD-1+ CD122+ CD44<sup>lo</sup> thymic IELP from WT (open circle), CD4Cre+Bcl2<sup>f/f</sup> (filled circle), and CD4CreBim<sup>f/f</sup> (open triangle) and CD4CreBim<sup>f/f</sup> Bcl2<sup>f/f</sup> (filled square) mice. Results are representative of at least 3 independent experiments with n=3 or more mice per group.
